# Supplementary material for: Analysis of the Adherence and Safety of Second Oral Glucose-Lowering Therapy in Routine Practice From the Mediterranean Area: A Retrospective Cohort Study
Source: PubMed Central journal article supplement (PMC8318034; doi:10.3389/fendo.2021.708372), 2021-07-14
Supplement: DataSheet_2.pdf [file DataSheet_2.pdf]

## ONLINE-ONLY SUPPLEMENTARY MATERIALS

The authors have provided these supplemental materials to give the readers additional information about the study.

# Analysis of the adherence and safety of second oral glucose-lowering therapy in routine practice from the Mediterranean area: A retrospective cohort study

Bogdan Vlacho, Manel Mata-Cases, Xavier Mundet-Tudurí, Joan Antoni Vallès-Callol, Jordi Real, Magí Farré, Xavier Cos, Kamlesh Khunti, Dídac Mauricio, Josep Franch-Nadal

| TABLE OF CONTENTS             |                                                                                                                                              |      |
|-------------------------------|----------------------------------------------------------------------------------------------------------------------------------------------|------|
|                               |                                                                                                                                              | PAGE |
| <b>Supplementary Figure 1</b> | Flow chart of the patients included in the study                                                                                             | 2    |
| <b>Supplementary Figure 2</b> | Balancing for baseline variables before and after propensity-score matching across the different treatment cohorts                           | 3    |
| <b>Supplementary Table 1</b>  | Baseline characteristics of the study population for users initiating second add-on treatment to metformin with DPP-4i, an SGLT-2i, or an SU | 4-5  |
| <b>Supplementary Table 2</b>  | Medical possession ration for each cohort drug                                                                                               | 6    |
| <b>Supplementary Table 4</b>  | Hazard ratios for discontinuation events among the cohorts                                                                                   | 7    |

**Supplementary Figure 1.** Flow chart of the patients included in the study

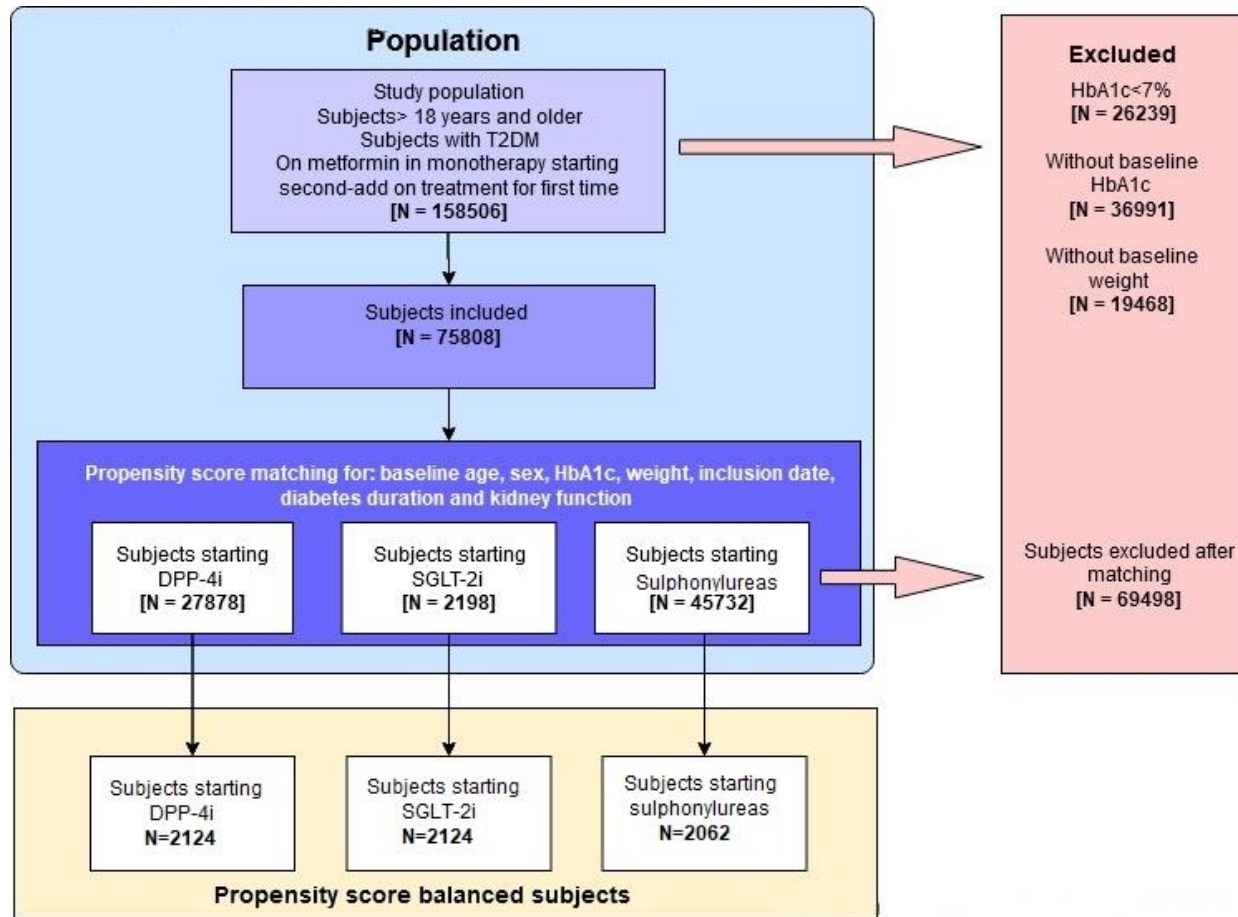

HbA1c, glycated hemoglobin; DPP-4i, dipeptidyl peptidase-4 inhibitors; MET, metformin; SGLT-2i, sodium/glucose cotransporter 2 inhibitors; SU, sulphonylureas

**Supplementary Figure 2.** Balancing for baseline variables before and after propensity-score matching across the different treatment cohorts

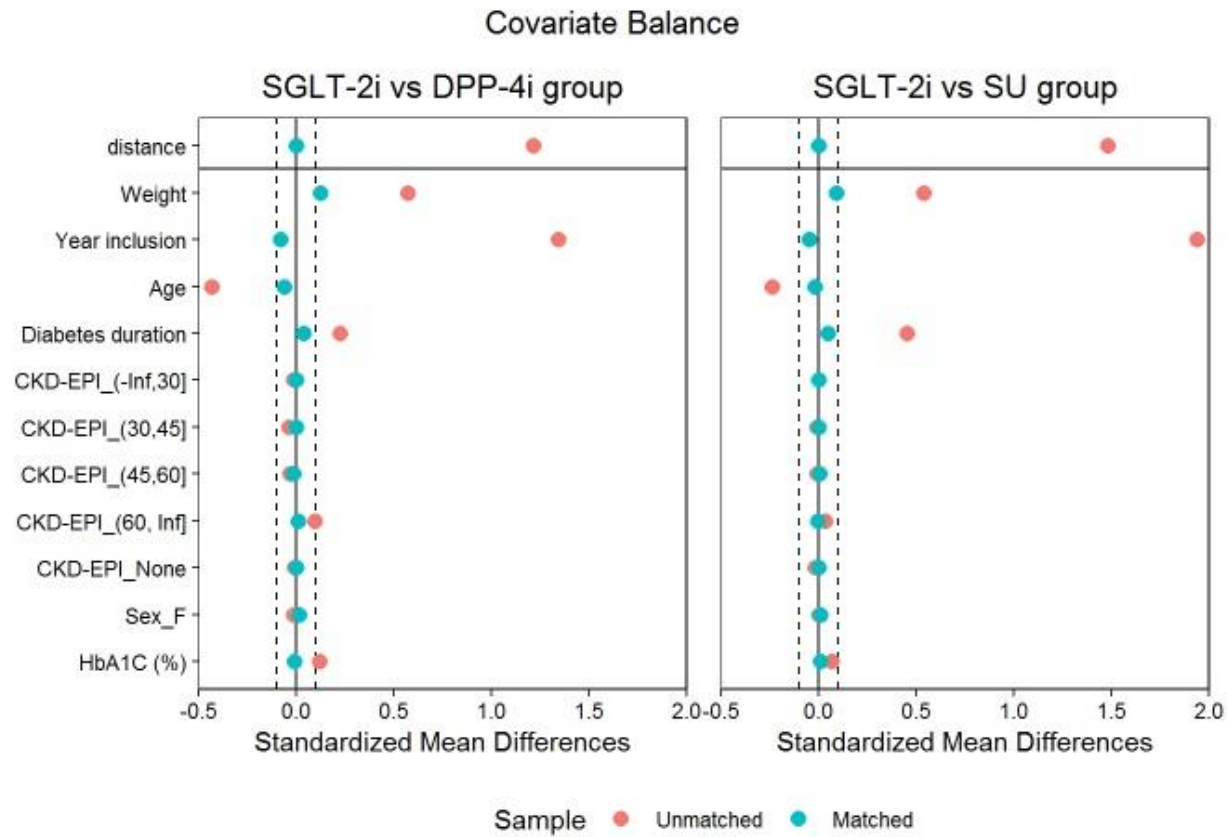

HbA1c, glyated hemoglobin; CDK-EPI, estimated glomerular filtration rate (CDK-EPI formula); F, female; DPP-4i, dipeptidyl peptidase-4 inhibitors; MET, metformin; SGLT-2i, sodium/glucose cotransporter 2 inhibitors; SU, sulphonylureas

**Supplementary Table 1.** Baseline characteristics of the study population for users initiating second add-on treatment to metformin with DPP-4i, an SGLT-2i, or an SU.

| Characteristic                                        | Met+DPP-4i<br>(n = 2124) | Met+SGLT-2i<br>(n = 2124) | Met+ SU<br>(n = 2062) |
|-------------------------------------------------------|--------------------------|---------------------------|-----------------------|
| Age, mean (SD), years                                 | 61.2 (12.1)              | 60.5 (11.1)               | 60.6 (12.0)           |
| <b>Gender, n (%)</b>                                  |                          |                           |                       |
| <b>Female</b>                                         | 892 (42.0)               | 924 (43.5)                | 868 (42.1)            |
| <b>Male</b>                                           | 1232 (58.0)              | 1200 (56.5)               | 1194 (57.9)           |
| <b>Smoking habit, n (%)</b>                           |                          |                           |                       |
| <b>Non-smoker</b>                                     | 1010 (47.9)              | 957 (45.3)                | 996 (48.5)            |
| <b>Ex-smoker</b>                                      | 700 (33.2)               | 758 (35.9)                | 616 (30.0)            |
| <b>Smoker</b>                                         | 398 (18.9)               | 398 (18.8)                | 440 (21.4)            |
| <b>Clinical variables</b>                             |                          |                           |                       |
| Diabetes duration, mean (SD), years                   | 7.64 (7.12)              | 7.89 (6.67)               | 7.28 (5.89)           |
| HbA1c, mean (SD), %                                   | 8.78 (1.48)              | 8.77 (1.49)               | 8.75 (1.39)           |
| HbA1c, mean (SD), mmol/mol                            | 72.3 (15.9)              | 72.5 (16.2)               | 72.4 (16.2)           |
| Weight, mean (SD), kg                                 | 89.2 (18.5)              | 91.4 (17.5)               | 89.5 (18.2)           |
| BMI, mean (SD), kg/m <sup>2</sup>                     | 32.8 (5.72)              | 33.9 (5.80)               | 32.8 (5.87)           |
| <b>Blood pressure, mean (SD), mmHg</b>                |                          |                           |                       |
| <b>SBP</b>                                            | 134 (14.4)               | 133 (13.8)                | 134 (13.5)            |
| <b>DBP</b>                                            | 78.8 (10.2)              | 78.0 (9.55)               | 79.4 (9.46)           |
| <b>Renal function</b>                                 |                          |                           |                       |
| <b>Albumin / creatinine ratio, mean (SD)</b>          | 57.1 (217)               | 72.0 (254)                | 43.4 (145)            |
| <b>eGFR, mean (SD), mL/min/1.73 m<sup>2</sup></b>     | 81.2 (13.4)              | 81.0 (13.0)               | 82.2 (12.9)           |
| <b>eGFR groups (mL/min/1.73 m<sup>2</sup>), n (%)</b> |                          |                           |                       |
| <b>&lt; 30</b>                                        | 5 (0.24)                 | 6 (0.28)                  | 10 (0.48)             |
| <b>30 – 44</b>                                        | 31 (1.46)                | 36 (1.69)                 | 34 (1.65)             |
| <b>45 – 59</b>                                        | 182 (8.57)               | 155 (7.30)                | 140 (6.79)            |
| <b>≥ 60</b>                                           | 1871 (88.1)              | 1892 (89.1)               | 1845 (89.5)           |

| Characteristic                                      | Met+DPP-4i<br>(n = 2124) | Met+SGLT-2i<br>(n = 2124) | Met+ SU<br>(n = 2062) |
|-----------------------------------------------------|--------------------------|---------------------------|-----------------------|
| <b>Lipid profile, mean (SD), mg/dL</b>              |                          |                           |                       |
| <b>Total Cholesterol</b>                            | 191 (45.2)               | 186 (44.2)                | 193 (41.4)            |
| <b>HDL-cholesterol</b>                              | 46.7 (11.3)              | 46.2 (12.1)               | 46.9 (11.5)           |
| <b>LDL-cholesterol</b>                              | 106 (33.3)               | 102 (34.1)                | 108 (33.0)            |
| <b>Triglycerides</b>                                | 207 (152)                | 216 (180)                 | 207 (167)             |
| <b>Number of comorbidities, mean (SD)</b>           | 1.86 (1.22)              | 2.05 (1.25)               | 1.76 (1.16)           |
| <b>Comorbidities, n (%)</b>                         |                          |                           |                       |
| <b>Heart failure</b>                                | 89 (4.19)                | 104 (4.90)                | 73 (3.54)             |
| <b>Peripheral vascular disease</b>                  | 79 (3.72)                | 116 (5.46)                | 77 (3.73)             |
| <b>Stroke</b>                                       | 125 (5.89)               | 156 (7.34)                | 99 (4.80)             |
| <b>Ischemic heart disease</b>                       | 205 (9.65)               | 334 (15.7)                | 164 (7.95)            |
| <b>Hypertension</b>                                 | 1426 (67.1)              | 1527 (71.9)               | 1363 (66.1)           |
| <b>Hyperlipidemia</b>                               | 1220 (57.4)              | 1318 (62.1)               | 1193 (57.9)           |
| <b>Diabetic neuropathy</b>                          | 77 (3.63)                | 155 (7.30)                | 42 (2.04)             |
| <b>Diabetic retinopathy</b>                         | 179 (8.43)               | 350 (16.5)                | 116 (5.63)            |
| <b>Acute/chronic pancreatitis</b>                   | 29 (1.37)                | 53 (2.50)                 | 19 (0.92)             |
| <b>COPD</b>                                         | 160 (7.53)               | 167 (7.86)                | 136 (6.60)            |
| <b>Renal failure</b>                                | 159 (7.49)               | 140 (6.59)                | 124 (6.01)            |
| <b>Relevant liver disease (excluding steatosis)</b> | 75 (3.53)                | 86 (4.05)                 | 47 (2.28)             |
| <b>Major Mental disorders</b>                       | 431 (20.3)               | 422 (19.9)                | 375 (18.2)            |

BMI, body mass index; DBP, diastolic blood pressure; eGFR, estimated glomerular filtration rate (CDK-EPI formula); HbA1c, glycated hemoglobin A1c; SBP, systolic blood pressure; SD, standard deviation; HDL, high-density lipoprotein; LDL, low-density lipoprotein; COPD, chronic obstructive pulmonary disease; DPP-4i, dipeptidyl peptidase-4 inhibitors; SGLT-2i, sodium/glucose cotransporter 2 inhibitors; SU, sulphonylureas; MET, metformin

**Supplementary Table 2.** Medical possession ratio for each cohort drug

|                    | Drugs                                  | Number of subjects | MPR (mean) | MPR (SD)  | Number of subjects with MPR >0.8 | Percentage of subjects with MPR >0.8 |
|--------------------|----------------------------------------|--------------------|------------|-----------|----------------------------------|--------------------------------------|
| <b>MET+DPP-4i</b>  | Metformin and sitagliptin fixed-dose   | 956                | 0.6905992  | 0.3366032 | 477                              | 49.90                                |
|                    | Sitagliptin and metformin              | 559                | 0.6928648  | 0.3479330 | 290                              | 51.88                                |
|                    | Metformin and vildagliptin fixed-dose  | 292                | 0.7563656  | 0.3205071 | 178                              | 60.96                                |
|                    | Linagliptin and metformin              | 99                 | 0.7234033  | 0.3603052 | 60                               | 60.61                                |
|                    | Metformin and linagliptin fixed-dose   | 87                 | 0.8112913  | 0.2919534 | 58                               | 66.67                                |
|                    | Vildagliptin and metformin             | 70                 | 0.7150758  | 0.3289317 | 38                               | 54.29                                |
|                    | Metformin and alogliptin fixed-dose    | 34                 | 0.5928021  | 0.3713236 | 13                               | 38.24                                |
|                    | Alogliptin and metformin               | 22                 | 0.8181361  | 0.2844784 | 16                               | 72.73                                |
|                    | Saxagliptin and metformin              | 3                  | 0.6666667  | 0.5773503 | 2                                | 66.67                                |
|                    | Metformin and saxagliptin fixed-dose   | 2                  | 0.2688730  | 0.3802439 | 0                                | 0.00                                 |
| <b>MET+SGLT-2i</b> | Dapagliflozin and metformin            | 539                | 0.8022109  | 0.3331420 | 384                              | 71.24                                |
|                    | Metformin and dapagliflozin fixed-dose | 521                | 0.8149182  | 0.3139571 | 374                              | 71.79                                |
|                    | Empagliflozin and metformin            | 501                | 0.7641476  | 0.3572087 | 334                              | 66.67                                |
|                    | Metformin and empagliflozin fixed-dose | 284                | 0.7172564  | 0.3751410 | 169                              | 59.51                                |
|                    | Canagliflozin and metformin            | 175                | 0.8242860  | 0.3077732 | 129                              | 73.71                                |
|                    | Metformin and canagliflozin fixed-dose | 104                | 0.7552019  | 0.3457346 | 65                               | 62.50                                |
| <b>MET+SU</b>      | Gliclazide and metformin               | 1716               | 0.5983946  | 0.3463613 | 648                              | 37.76                                |
|                    | Glimepiride and metformin              | 198                | 0.9146698  | 0.2179803 | 169                              | 85.35                                |
|                    | Glibenclamide and metformin            | 125                | 0.6599701  | 0.3414771 | 55                               | 44.35                                |
|                    | Glipizide and metformin                | 23                 | 0.7276963  | 0.3251168 | 11                               | 50.00                                |

MPR: Medical possession ratio; DPP-4i, dipeptidyl peptidase-4 inhibitors; SD, standard deviation; SGLT-2i, sodium/glucose cotransporter 2 inhibitors; SU, sulphonylureas; MET, metformin

**Supplementary Table 3.** Hazard ratios for discontinuation events among the cohorts

|             | With stopping event<br>N=4305 | Without stopping event<br>N=1674 | HR<br>(98% CI)   | p-value |
|-------------|-------------------------------|----------------------------------|------------------|---------|
| MET+DPP-4i  | 1602 (37.2%)                  | 429 (25.6%)                      | Ref.             | Ref.    |
| MET+SGLT-2i | 1341 (31.1%)                  | 609 (36.4%)                      | 1.43 (1.26;1.62) | <0.001  |
| MET+ SU     | 1362 (31.6%)                  | 636 (38.0%)                      | 1.60 (1.42;1.81) | <0.001  |
|             |                               |                                  |                  |         |
| MET+DPP-4i  | 1602 (37.2%)                  | 429 (25.6%)                      | 0.70 (0.62;0.79) | <0.001  |
| MET+SGLT-2i | 1341 (31.1%)                  | 609 (36.4%)                      | Ref.             | Ref.    |
| MET+ SU     | 1362 (31.6%)                  | 636 (38.0%)                      | 1.12 (1.00;1.26) | 0.041   |

CI, confidence interval; IDPP-4i, dipeptidyl peptidase-4 inhibitors; HR, hazard ratio; SGLT-2i, sodium/glucose cotransporter 2 inhibitors; SU, sulphonylureas; MET, metformin
